# Supplementary material for: A Shotgun Metagenomic Mining Approach of Human Semen Microbiome
Source: Research Square preprint supplement (doi:10.21203/rs.3.rs-1220437/v1), 2022-03-16
Supplement: Supplementary file 1 [file b1c11c293997cb929b7841de.docx]

Table S1. General data of cohort selection.

|  | **Azoospermics (2)** | **oligospermics (18)** | **normospermics (17)** | **normospermics above avg (13)** |
| --- | --- | --- | --- | --- |
|  | avg ± std dev | avg ± std dev | avg ± std dev | avg ± std dev |
| **age (years)** | 31 ± 1 | 33.6 ± 4.3 | 34.9 ± 6.3 | 31.8 ± 4.9 |
| **weight (Kg)** | 69 ± 11 | 84.1 ± 17.3 | 77.4 ± 15.7 | 79.4 ± 22.8 |
| **height (m)** | 1.6 ± 0.02 | 1.7 ± 0.1 | 1.9 ± 0.3 | 1.8 ± 0.1 |
| **Body Mass Index - BMI** | 26 ± 3.4 | 27.2 ± 3.8 | 26.3 ± 5.3 | 25 ± 6.8 |
| **infertility time (years)** | 4.5 ± 0.5 | 6.6 ± 3.3 | 5.9 ± 2.8 | 3.6 ± 1 |
| **nº of children** | 0 | 0.2 ± 0.4 | 0.3 ± 0.4 | 0.2 ± 0.3 |
| **abstinence days** | 4 ± 1 | 4.7 ± 1.4 | 4.9 ± 1.3 | 4.5 ± 1.3 |
| **liquefaction time (min)** | 20 | 30.6 ± 14.1 | 32.4 ± 16 | 29.2 ± 11.4 |
| **volume (mL)** | 4.3 ± 0.3 | 4 ± 1.2 | 2.8 ± 0.8 | 3 ± 1 |
| **[ ] / mL** | 0 | 6.3 ± 3.9 | 42.6 ± 17.3 | 106.7 ± 24.3 |
| **linear progressive motility (%)** | 0 | 15.8 ± 8 | 27.1 ± 8 | 35.5 ± 6.1 |
| **non-linear progressive motility (%)** | 0 | 27.7 ± 13.8 | 31.9 ± 8 | 40.3 ± 5.1 |
| **non-progressive motility (%)** | 0 | 4.4 ± 2.1 | 2.9 ± 1.3 | 1.7 ± 0.6 |
| **immotility (%)** | 0 | 52 ± 19.8 | 36.8 ± 12.4 | 22.4 ± 7.1 |
| **cells (x106)** | 0.1 | 0.3 ± 0.3 | 0.7 ± 0.6 | 0.4 ± 0.4 |
| **Kruger morphology (%)** | 0 | 2.1 ± 0.8 | 5.3 ± 1 | 7.6 ± 1.4 |
| **performs physical activity (% of yes)** | 100 | 44.4 | 58.8 | 53.8 |
| **frequence (week)** | 2 | 3 ± 2 | 3 ± 1 | 3 ± 1 |
| **do you smoke? (% of yes)** | 0 | 0,0 | 11.8 | 7.7 |
| **do you drink alcohol? (% of yes)** | 50 | 33.3 | 29.4 | 46.2 |
| **do you drink coffee? (% of yes)** | 100 | 77.8 | 64.7 | 76.9 |
| **do you take frequent medicine? (% of yes)** | 0 | 11.1 | 23.5 | 15.4 |
| **hernia diagnosis (% of yes)** | 0 | 0 | 11.8 | 0 |
| **varicocele diagnosis (% of yes)** | 100 | 44.4 | 11.8 | 0 |
